# Supplementary material for: Translation of Two Healthy Eating and Active Living Support Programs for Parents of 2–6-Year-Old Children: Outcomes of the ‘Time for Healthy Habits’ Parallel Partially Randomised Preference Trial
Source: MDPI journal article supplement (doi:10.3390/nu13103348), 2021-09-24
Supplement: s1 [file s1]

**Table S1.** Results for primary outcome by study group (CDQ Score, Fruit and Vegetable Daily Intake, and Meeting Fruit and Vegetable Guidelines) complete case unadjusted results.

|                                |         | <b>CDQ Total score</b>                                              |
|--------------------------------|---------|---------------------------------------------------------------------|
|                                |         | Complete case <sup>†</sup> :<br>Mean difference vs control (95% CI) |
| <b>RANDOMISED ONLY</b> (n=240) | Written | Reference                                                           |
|                                | Online  | 0.42 (-0.75, 1.58)                                                  |
|                                | Phone   | 0.55 (-0.73, 1.83)                                                  |
| <b>PREFERENCE ONLY</b> (n=218) | Written | Reference                                                           |
|                                | Online  | 0.40 (-0.88, 1.68)                                                  |
|                                | Phone   | -0.85 (-2.74, 1.04)                                                 |
| <b>ALL</b> (n=458)             | Written | Reference                                                           |
|                                | Online  | 0.43 (-0.41, 1.28)                                                  |
|                                | Phone   | 0.19 (-0.85, 1.24)                                                  |
|                                |         | <b>Fruit Serves per Day</b>                                         |
|                                |         | Complete case <sup>†</sup> :<br>Mean difference vs control (95% CI) |
| <b>RANDOMISED ONLY</b> (n=240) | Written | Reference                                                           |
|                                | Online  | -0.09 (-0.39, 0.21)                                                 |
|                                | Phone   | 0.16 (-0.17, 0.48)                                                  |
| <b>PREFERENCE ONLY</b> (n=218) | Written | Reference                                                           |
|                                | Online  | -0.21 (-0.53, 0.11)                                                 |
|                                | Phone   | -0.46 (-0.93, 0.01)                                                 |
| <b>ALL</b> (n=458)             | Written | Reference                                                           |
|                                | Online  | -0.11 (-0.33, 0.10)                                                 |
|                                | Phone   | -0.06 (-0.33, 0.20)                                                 |
|                                |         | <b>Vegetable Serves per Day</b>                                     |
|                                |         | Complete case <sup>†</sup> :<br>Mean difference vs control (95% CI) |
| <b>RANDOMISED ONLY</b> (n=240) | Written | Reference                                                           |
|                                | Online  | -0.14 (-0.46, 0.18)                                                 |
|                                | Phone   | 0.17 (-0.18, 0.51)                                                  |
| <b>PREFERENCE ONLY</b> (n=218) | Written | Reference                                                           |
|                                | Online  | 0.10 (-0.27, 0.45)                                                  |
|                                | Phone   | 0.16 (-0.36, 0.65)                                                  |
| <b>ALL</b> (n=458)             | Written | Reference                                                           |
|                                | Online  | -0.36 (-0.27, 0.20)                                                 |
|                                | Phone   | 0.18 (-0.10, 0.46)                                                  |
|                                |         | <b>Meeting Fruit and Vegetable Guidelines</b>                       |
|                                |         | Complete case <sup>†</sup> :<br>Odds vs control<br>(95% CI)         |
| <b>RANDOMISED ONLY</b> (n=240) | Written | Reference                                                           |
|                                | Online  | 1.92 (0.74, 4.99)                                                   |
|                                | Phone   | 2.51 (0.85, 7.40)                                                   |
| <b>PREFERENCE ONLY</b> (n=218) | Written | Reference                                                           |
|                                | Online  | 1.64 (0.63, 4.25)                                                   |
|                                | Phone   | 0.70 (0.19, 2.64)                                                   |
| <b>ALL</b> (n=458)             | Written | Reference                                                           |
|                                | Online  | 1.77 (0.91, 3.44)                                                   |
|                                | Phone   | 1.63 (0.72, 3.68)                                                   |

<sup>†</sup>Complete case analysis: this analysis included data that reported baseline and follow-up data.

**Table S2:** Results for secondary outcomes by study group (non-core food intake, BMI percentile, total physical activity, moderate to vigorous physical activity, sleep, and compliance with physical activity and sleep guidelines) complete case analysis unadjusted.

|                                |         | Non-core CDQ Score                                                  |
|--------------------------------|---------|---------------------------------------------------------------------|
|                                |         | Complete case <sup>†</sup> :<br>Mean difference vs control (95% CI) |
| <b>RANDOMISED ONLY</b> (n=240) | Written | Reference                                                           |
|                                | Online  | -0.02 (-0.34,0.29)                                                  |
|                                | Phone   | -0.22 (-0.57,0.13)                                                  |
| <b>PREFERENCE ONLY</b> (n=218) | Written | Reference                                                           |
|                                | Online  | -0.11 (-0.43,0.21)                                                  |
|                                | Phone   | -0.47 (-0.95,0.01)                                                  |
| <b>ALL</b> (n=458)             | Written | Reference                                                           |
|                                | Online  | -0.06 (-0.28,0.17)                                                  |
|                                | Phone   | -0.32 (-0.59,-0.04)*                                                |
|                                |         | BMI Percentile (WHO)                                                |
|                                |         | Complete case <sup>†</sup> :<br>Mean difference vs control (95% CI) |
| <b>RANDOMISED ONLY</b> (n=240) | Written | Reference                                                           |
|                                | Online  | 0.07 (-0.08,0.21)                                                   |
|                                | Phone   | 0.05 (-0.11,0.22)                                                   |
| <b>PREFERENCE ONLY</b> (n=218) | Written | Reference                                                           |
|                                | Online  | -0.06 (-0.23,0.10)                                                  |
|                                | Phone   | 0.02 (-0.21,0.25)                                                   |
| <b>ALL</b> (n=458)             | Written | Reference                                                           |
|                                | Online  | -0.01(-0.11,0.10)                                                   |
|                                | Phone   | 0.04 (-0.09,0.18)                                                   |
|                                |         | Total Physical Activity (minutes) on Previous Day                   |
|                                |         | Complete case <sup>†</sup> :<br>Mean difference vs control (95% CI) |
| <b>RANDOMISED ONLY</b> (n=240) | Written | Reference                                                           |
|                                | Online  | -19.67 (-76.15,36.80)                                               |
|                                | Phone   | -20.59 (-103.73,62.55)                                              |
| <b>PREFERENCE ONLY</b> (n=218) | Written | Reference                                                           |
|                                | Online  | -27.55 (-71.92,16.82)                                               |
|                                | Phone   | 29.36 (-18.30,77.02)                                                |
| <b>ALL</b> (n=458)             | Written | Reference                                                           |
|                                | Online  | -20.53 (-55.36,14.30)                                               |
|                                | Phone   | 12.13 (-30.57,54.83)                                                |
|                                |         | Moderate to Vigorous Physical Activity (minutes) on Previous Day    |
|                                |         | Complete case <sup>†</sup> :<br>Mean difference vs control (95% CI) |
| <b>RANDOMISED ONLY</b> (n=240) | Written | Reference                                                           |
|                                | Online  | -7.13 (-34.86,20.60)                                                |
|                                | Phone   | 10.19 (-19.54,39.91)                                                |
| <b>PREFERENCE ONLY</b> (n=218) | Written | Reference                                                           |
|                                | Online  | -11.60 (-39.58,16.39)                                               |
|                                | Phone   | -37.89 (-79.59,3.82)                                                |
| <b>ALL</b> (n=458)             | Written | Reference                                                           |
|                                | Online  | -9.52 (-28.97,9.94)                                                 |
|                                | Phone   | -2.52(-26.17,21.09)                                                 |
|                                |         | Screen Time (minutes) on Previous Day                               |
|                                |         | Complete case <sup>†</sup> :<br>Mean difference vs control (95% CI) |
| <b>RANDOMISED ONLY</b> (n=240) | Written | Reference                                                           |
|                                | Online  | 11.27 (-17.78,40.31)                                                |
|                                | Phone   | -16.05 (-47.57,15.47)                                               |
| <b>PREFERENCE ONLY</b> (n=218) | Written | Reference                                                           |
|                                | Online  | -1.22 (-31.75,29.30)                                                |
|                                | Phone   | 15.99 (-30.04,62.02)                                                |
| <b>ALL</b> (n=458)             | Written | Reference                                                           |
|                                | Online  | 7.07 (-13.72,27.87)                                                 |
|                                | Phone   | -8.64 (-34.38,17.11)                                                |
|                                |         | Sleep (hours) on Previous Day                                       |

|                                |         | Complete case <sup>†</sup> :<br>Mean difference vs control (95% CI) |
|--------------------------------|---------|---------------------------------------------------------------------|
| <b>RANDOMISED ONLY</b> (n=240) | Written | Reference                                                           |
|                                | Online  | -0.03 (-0.33,0.26)                                                  |
|                                | Phone   | -0.12 (-0.44,0.20)                                                  |
| <b>PREFERENCE ONLY</b> (n=218) | Written | Reference                                                           |
|                                | Online  | -0.26 (-0.63,0.10)                                                  |
|                                | Phone   | 0.07 (-0.48,0.61)                                                   |
| <b>ALL</b> (n=458)             | Written | Reference                                                           |
|                                | Online  | -0.18 (-0.41,0.05)                                                  |
|                                | Phone   | -0.05 (-0.34,0.23)                                                  |
|                                |         | <b>Meeting Physical Activity Guidelines</b>                         |
|                                |         | Complete case <sup>†</sup> :<br>Odds vs control (95% CI)            |
| <b>RANDOMISED ONLY</b> (n=240) | Written | Reference                                                           |
|                                | Online  | 0.88 (0.38,2.01)                                                    |
|                                | Phone   | 1.47 (0.55,3.90)                                                    |
| <b>PREFERENCE ONLY</b> (n=218) | Written | Reference                                                           |
|                                | Online  | 0.42 (0.12,1.53)                                                    |
|                                | Phone   | 0.57 (0.22,1.47)                                                    |
| <b>ALL</b> (n=458)             | Written | Reference                                                           |
|                                | Online  | 0.74 (0.40,1.36)                                                    |
|                                | Phone   | 0.91 (0.43,1.96)                                                    |
|                                |         | <b>Meeting Screen Time Guidelines</b>                               |
|                                |         | Complete case <sup>†</sup> :<br>Odds vs control (95% CI)            |
| <b>RANDOMISED ONLY</b> (n=240) | Written | Reference                                                           |
|                                | Online  | 0.42 (0.18,0.96)                                                    |
|                                | Phone   | 1.22 (0.518,2.883)                                                  |
| <b>PREFERENCE ONLY</b> (n=218) | Written | Reference                                                           |
|                                | Online  | 0.85 (0.39,1.87)                                                    |
|                                | Phone   | 1.29 (0.40,4.15)                                                    |
| <b>ALL</b> (n=458)             | Written | Reference                                                           |
|                                | Online  | 0.64 (0.37,1.11)                                                    |
|                                | Phone   | 1.27 (0.65,2.50)                                                    |
|                                |         | <b>Meeting Sleep Guidelines</b>                                     |
|                                |         | Complete case <sup>†</sup> :<br>Odds vs control (95% CI)            |
| <b>RANDOMISED ONLY</b> (n=240) | Written | Reference                                                           |
|                                | Online  | 1.63 (0.54,4.93)                                                    |
|                                | Phone   | 0.50 (0.19,1.32)                                                    |
| <b>PREFERENCE ONLY</b> (n=218) | Written | Reference                                                           |
|                                | Online  | 0.49 (0.16,1.56)                                                    |
|                                | Phone   | 0.50 (0.11,2.33)                                                    |
| <b>ALL</b> (n=458)             | Written | Reference                                                           |
|                                | Online  | 0.88 (0.42,1.85)                                                    |
|                                | Phone   | 0.50 (0.22,1.13)                                                    |

<sup>†</sup>Complete case analysis: this analysis included data that reported baseline and follow-up data.

<sup>‡</sup> Multiple imputations analysis: follow-up data was imputed for missing follow-up and covariate data.

\* p <0.05,
